# Supplementary material for: A new noncentrosymmetric vanadoborate: synthesis, crystal structure and characterization of K2SrVB5O12
Source: Royal Society of Chemistry journal article supplement (doi:10.1039/c2dt30608e), 2012-01-01
Supplement: c2dt30608e.pdf [file c2dt30608e.pdf]

## Supporting Information

**A new noncentrosymmetric vanadoborate: synthesis, crystal structure and characterization of**

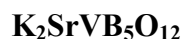

Songjie Chen<sup>1,2</sup>, Shilie Pan<sup>1\*</sup>, Wenwu Zhao<sup>1,2</sup>, Hongwei Yu<sup>1,2</sup>, Hongping Wu<sup>1</sup>, Zhihua Yang<sup>1</sup>, Yun  
Yang<sup>1</sup>

<sup>1</sup>*Xinjiang Key Laboratory of Electronic Information Materials and Devices, Xinjiang Technical Institute  
of Physics & Chemistry, Chinese Academy of Sciences, 40–1 South Beijing Road, Urumqi 830011,  
China;* <sup>2</sup>*Graduate School of the Chinese Academy of Sciences, Beijing 100049, China*

\*To whom correspondence should be addressed. E-mail: slpan@ms.xjb.ac.cn (S. Pan). Phone: (86)-991-

3674558. Fax: (86)-991-3838957.

**Figure S1.** The coordination of K atoms. The green ones are K(1) atoms, and the blue ones are K(2) atoms.

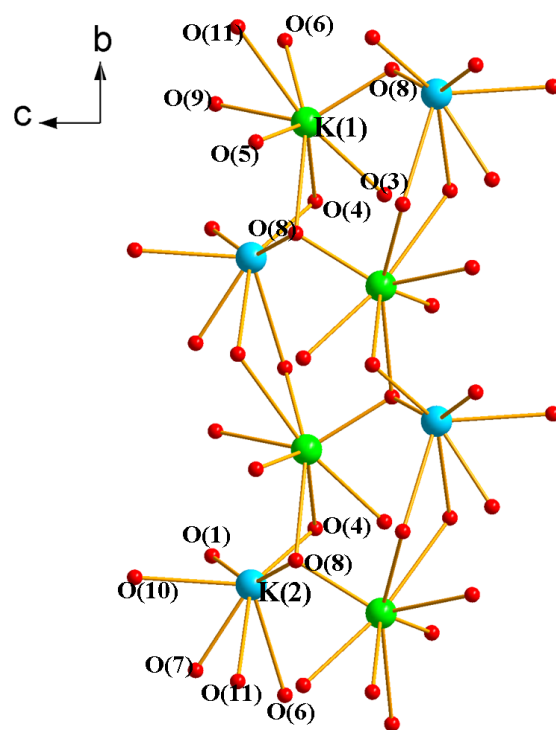

**Figure S2.** The coordination of Sr atoms.

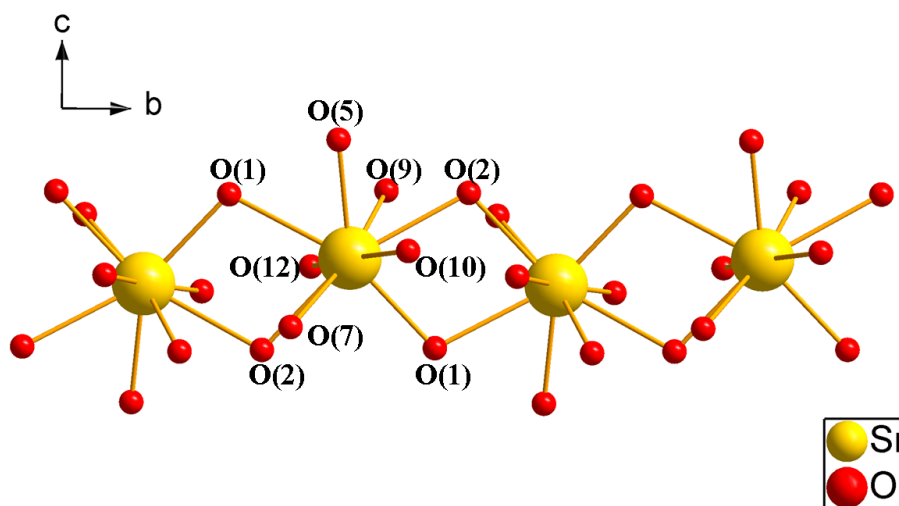

**Figure S3.** UV-Vis-NIR Diffuse-reflectance Spectrum of  $K_2SrVB_5O_{12}$ .

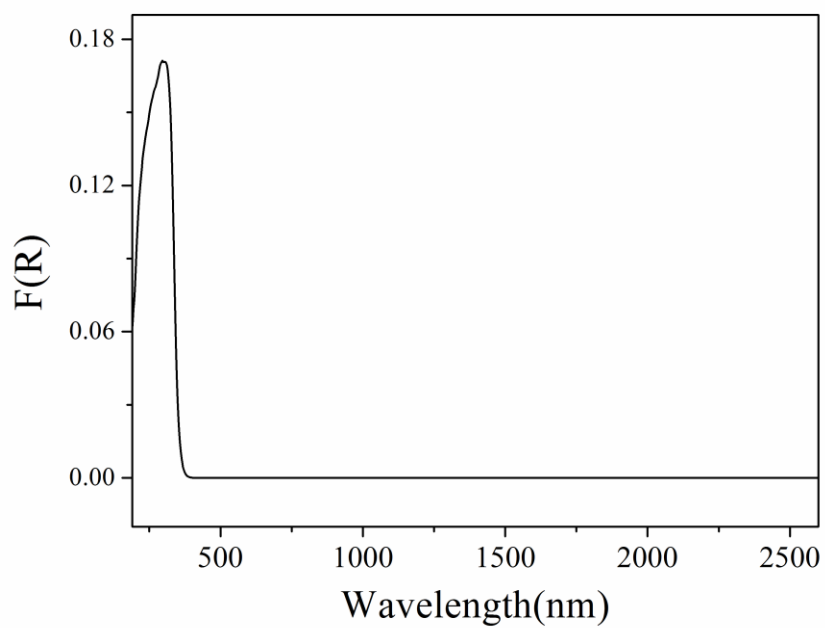

**Figure S4.** XRD patterns of  $\text{K}_2\text{SrVB}_5\text{O}_{12}$ .

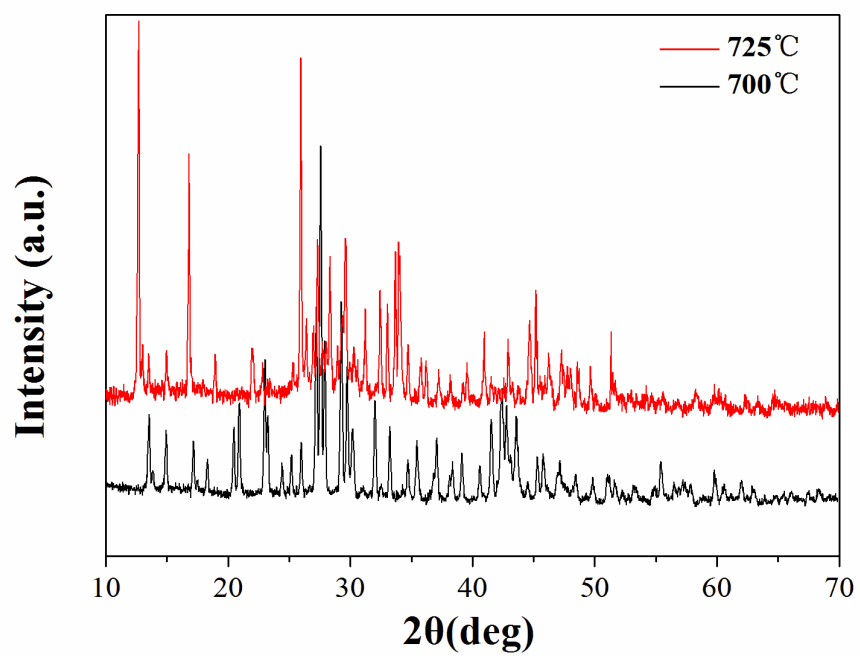

**Figure S5.** Absorption spectrum of  $K_2SrVB_5O_{12}$ .

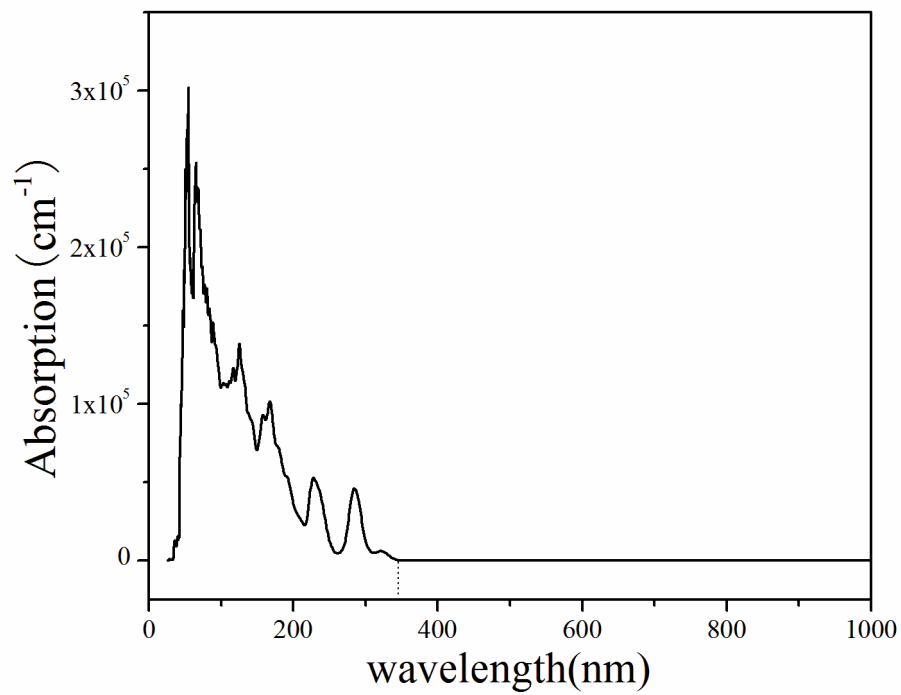

**Table S1.** Selected bond distances (Å) and angles (deg) for K<sub>2</sub>SrVB<sub>5</sub>O<sub>12</sub>.

|                   |          |                    |           |
|-------------------|----------|--------------------|-----------|
| Sr(1)-O(5)        | 2.499(6) | K(2)-O(4)#9        | 2.785(7)  |
| Sr(1)-O(1)#1      | 2.556(7) | K(2)-O(1)#9        | 2.955(7)  |
| Sr(1)-O(7)        | 2.571(6) | K(2)-O(10)         | 2.986(7)  |
| Sr(1)-O(9)#1      | 2.607(6) | K(2)-O(11)         | 2.993(7)  |
| Sr(1)-O(2)        | 2.623(7) | K(2)-O(6)#5        | 3.134(7)  |
| Sr(1)-O(10)#2     | 2.773(6) | B(1)-O(7)          | 1.459(11) |
| Sr(1)-O(2)#1      | 2.782(7) | B(1)-O(9)          | 1.466(12) |
| Sr(1)-O(1)        | 2.799(7) | B(1)-O(6)#10       | 1.469(11) |
| Sr(1)-O(12)#1     | 2.902(6) | B(1)-O(2)          | 1.483(11) |
| V(1)-O(8)         | 1.629(7) | B(2)-O(12)         | 1.340(12) |
| V(1)-O(5)         | 1.661(8) | B(2)-O(10)         | 1.356(11) |
| V(1)-O(1)         | 1.692(7) | B(2)-O(9)          | 1.401(11) |
| V(1)-O(4)         | 1.861(6) | B(3)-O(11)#2       | 1.452(12) |
| K(1)-O(8)         | 2.569(8) | B(3)-O(12)#2       | 1.453(12) |
| K(1)-O(5)#5       | 2.629(6) | B(3)-O(7)          | 1.456(11) |
| K(1)-O(6)         | 2.772(6) | B(3)-O(10)         | 1.519(11) |
| K(1)-O(3)         | 2.862(6) | B(4)-O(11)         | 1.338(12) |
| K(1)-O(9)#6       | 2.888(7) | B(4)-O(2)#11       | 1.369(11) |
| K(1)-O(4)#7       | 3.151(7) | B(4)-O(3)          | 1.396(12) |
| K(1)-O(11)#4      | 3.163(7) | B(5)-O(6)          | 1.334(11) |
| K(1)-O(8)#5       | 3.224(8) | B(5)-O(3)#12       | 1.366(11) |
| K(2)-O(8)         | 2.541(8) | B(5)-O(4)          | 1.367(11) |
| K(2)-O(7)#8       | 2.639(6) | O(11)#2-B(3)-O(7)  | 108.3(7)  |
| O(7)-B(1)-O(9)    | 108.5(7) | O(12)#2-B(3)-O(7)  | 112.6(8)  |
| O(7)-B(1)-O(6)#10 | 113.3(7) | O(11)#2-B(3)-O(10) | 109.8(8)  |
| O(9)-B(1)-O(6)#10 | 109.8(7) | O(12)#2-B(3)-O(10) | 104.2(7)  |
| O(7)-B(1)-O(2)    | 107.0(7) | O(7)-B(3)-O(10)    | 110.2(7)  |
| O(9)-B(1)-O(2)    | 107.6(7) | O(11)-B(4)-O(2)#11 | 124.1(9)  |

|                      |          |                   |          |
|----------------------|----------|-------------------|----------|
| O(6)#10-B(1)-O(2)    | 110.4(7) | O(11)-B(4)-O(3)   | 116.7(8) |
| O(12)-B(2)-O(10)     | 125.7(9) | O(2)#11-B(4)-O(3) | 119.2(9) |
| O(12)-B(2)-O(9)      | 112.7(8) | O(6)-B(5)-O(3)#12 | 121.2(9) |
| O(10)-B(2)-O(9)      | 121.6(9) | O(6)-B(5)-O(4)    | 122.7(8) |
| O(11)#2-B(3)-O(12)#2 | 111.7(8) | O(3)#12-B(5)-O(4) | 116.1(7) |

---

Symmetry transformations used to generate equivalent atoms:

#1  $-x+2, y+1/2, -z+2$  #2  $-x+1, y+1/2, -z+2$

#3  $x+1, y, z$  #4  $-x+1, y+1/2, -z+1$  #5  $-x+1, y-1/2, -z+1$

#6  $x, y, z-1$  #7  $-x+2, y-1/2, -z+1$  #8  $-x+1, y-1/2, -z+2$

#9  $x-1, y, z$  #10  $x, y, z+1$  #11  $-x+2, y-1/2, -z+2$

#12  $-x+2, y+1/2, -z+1$
